# Supplementary material
Source: HighWire-hosted journal article supplement (https://www.cmaj.ca/highwire/filestream/58477/field_highwire_adjunct_files/0/249-app1A.pdf)
Supplement: 249-app1A.pdf [file 249-app1A.pdf]

## Appendix 1A

### Procedure for donning enhanced respiratory and contact precautions

*Before entering patient's room*, put on barrier equipment in this sequence:

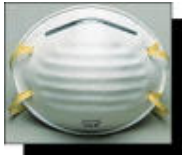

N95 mask

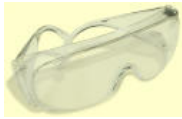

Goggles

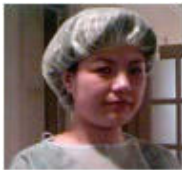

Disposable hair cover

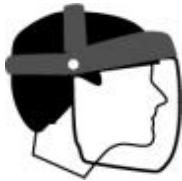

Face shield

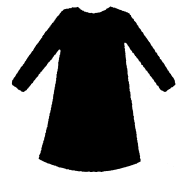

Gown (an assistant will secure your gown's Velcro and ties)

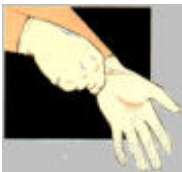

Two pairs of gloves
